# Supplementary material
Source: HighWire-hosted journal article supplement (https://www.cmajopen.ca/highwire/filestream/81333/field_highwire_adjunct_files/4/2019-0229-5-at.pdf)
Supplement: 2019-0229-5-at.pdf [file 2019-0229-5-at.pdf]

**Appendix 5 (as supplied by the authors)****Prevalence and Association Between Past-Year Cannabis Use and Level of Education Among Men and Women in Canada, 2017**

| <b>Level of Education</b> | <b>Men</b>                        |                    |                     | <b>Women</b>                      |                    |                     |
|---------------------------|-----------------------------------|--------------------|---------------------|-----------------------------------|--------------------|---------------------|
|                           | <b>Prevalence, %<br/>(95% CI)</b> | <b>OR (95% CI)</b> | <b>aOR (95% CI)</b> | <b>Prevalence, %<br/>(95% CI)</b> | <b>OR (95% CI)</b> | <b>aOR (95% CI)</b> |
| Less than High School     | 13.3 (9.8-17.8)                   | 1.00               | 1.00                | 6.9 (5.1-9.2)                     | 1.00               | 1.00                |
| Completed High School     | 20.5 (16.9-24.6)                  | 1.18 (0.70-1.97)   | 1.25 (0.71-2.20)    | 12.6 (9.7-16.3)                   | 1.78 (1.15-2.76)   | 1.70 (1.07-2.70)    |
| Completed College         | 20.8 (14.8-28.3)                  | 1.19 (0.63-2.26)   | 1.38 (0.69-2.80)    | 11.9 (9.1-15.3)                   | 1.96 (1.09-3.53)   | 2.45 (1.35-4.46)    |
| Completed University      | 17.2 (12.3-23.5)                  | 1.09 (0.57-2.10)   | 1.73 (0.86-3.48)    | 8.5 (6.2-11.6)                    | 1.17 (0.64-2.16)   | 1.81 (0.95-3.48)    |

Data from the 2017 Canadian Tobacco, Alcohol and Drugs Survey
